# Supplementary material
Source: publisher figshare collection journal article supplement (https://frontiersin.figshare.com/ndownloader/files/34818787)
Supplement: Supplementary file [file 34818787]

## Supplementary Material

Supplementary Table 1. Allele and genotype distribution in male or female for the schizophrenia patients and healthy controls

| SNP ID    |        |         | allele frequency | p value      | genotypic frequency |            |            | p value | H-W p value |
|-----------|--------|---------|------------------|--------------|---------------------|------------|------------|---------|-------------|
| rs1640299 |        |         | A                |              | AA                  | AC         | CC         |         |             |
|           | male   | case    | 920(0.759)       | 0.867        | 347(0.573)          | 226(0.373) | 33(0.054)  | 0.974   | 0.629       |
|           |        | control | 865(0.754)       |              | 324(0.566)          | 217(0.379) | 31(0.054)  |         | 0.493       |
|           | female | case    | 612(0.779)       | 0.108        | 237(0.603)          | 138(0.351) | 18(0.046)  | 0.082   | 0.712       |
|           |        | control | 638(0.732)       |              | 233(0.534)          | 172(0.394) | 31(0.071)  |         | 0.923       |
| rs2286928 |        |         | A                |              | AA                  | AC         | CC         |         |             |
|           | male   | case    | 86(0.070)        | <b>0.028</b> | 3(0.005)            | 80(0.130)  | 533(0.865) | 0.056   | 0.992       |
|           |        | control | 51(0.044)        |              | 3(0.005)            | 45(0.078)  | 530(0.917) |         | 0.064       |
|           | female | case    | 38(0.048)        | 0.738        | 3(0.008)            | 32(0.080)  | 363(0.912) | 0.175   | 0.021       |
|           |        | control | 39(0.044)        |              | 0(0.000)            | 39(0.089)  | 401(0.911) |         | 0.331       |
| rs417309  |        |         | A                |              | AA                  | AC         | CC         |         |             |
|           | male   | case    | 41(0.035)        | 0.876        | 1(0.002)            | 39(0.066)  | 550(0.932) | 0.617   | 0.723       |
|           |        | control | 38(0.034)        |              | 0(0.000)            | 38(0.067)  | 528(0.933) |         | 0.408       |
|           | female | case    | 39(0.051)        | 0.104        | 3(0.008)            | 33(0.086)  | 349(0.906) | 0.103   | 0.033       |
|           |        | control | 25(0.029)        |              | 1(0.002)            | 23(0.054)  | 404(0.944) |         | 0.279       |
| rs3757    |        |         | C                |              | AA                  | AC         | CC         |         |             |
|           | male   | case    | 208(0.182)       | 0.094        | 23(0.040)           | 162(0.284) | 385(0.675) | 0.188   | 0.258       |
|           |        | control | 234(0.210)       |              | 19(0.034)           | 196(0.353) | 341(0.613) |         | 0.151       |
|           | female | case    | 127(0.165)       | <b>0.028</b> | 11(0.029)           | 105(0.273) | 269(0.699) | 0.108   | 0.845       |
|           |        | control | 184(0.217)       |              | 25(0.059)           | 134(0.317) | 264(0.624) |         | 0.153       |

p-values after Bonferroni correction < 0.05 are in boldface

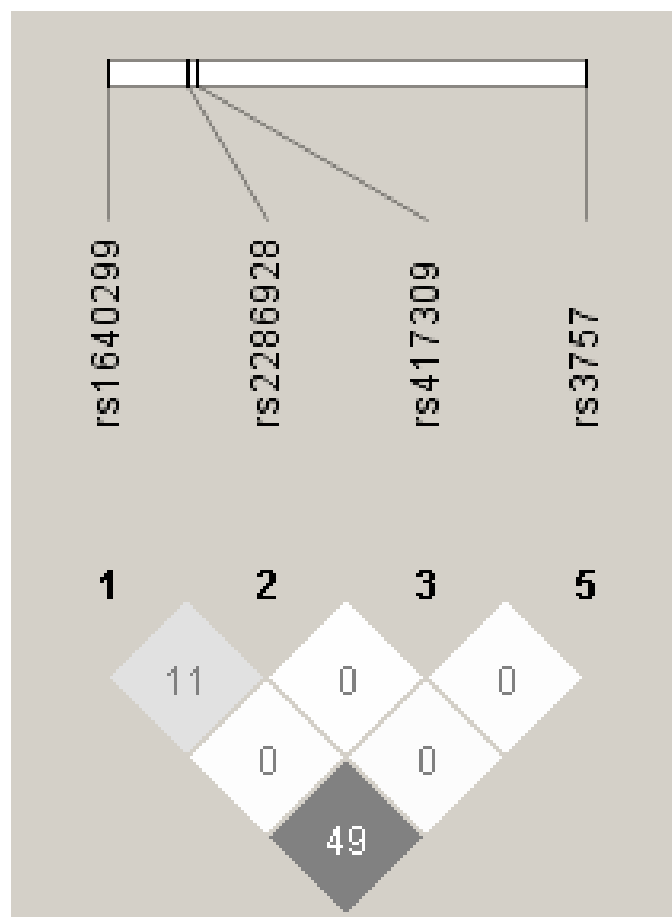

**Supplementary Figure 1.** LD between SNPs of DGCR8.  $r^2$  between marker pairs is indicated by the shaded matrices.

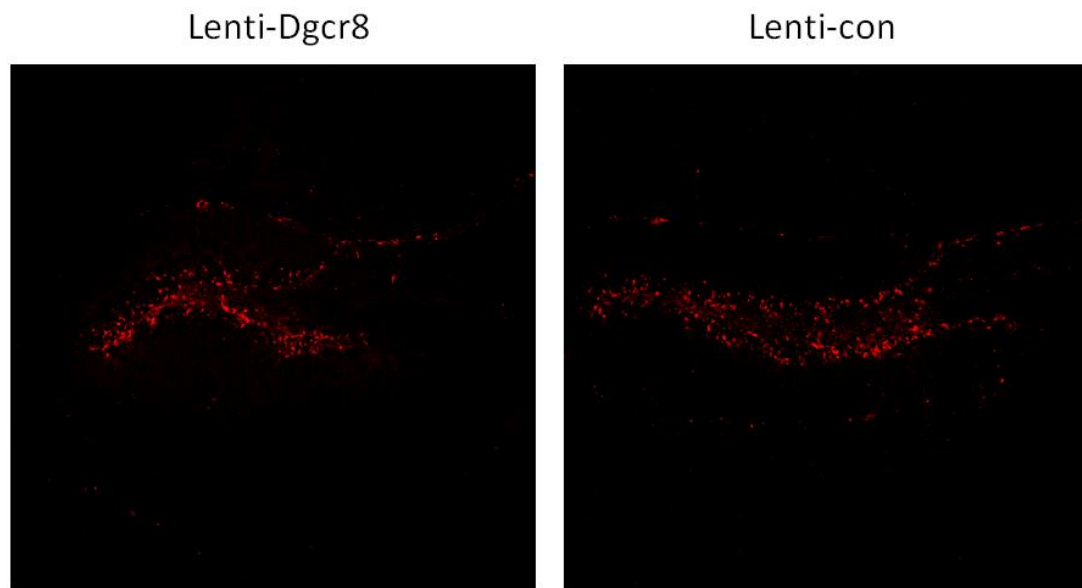

**Supplementary Figure 2.** Position of lentiviral injection. Both of lenti-Dgcr8 (left) and lenti-con (right) infected the dentate gyrus of hippocampus.

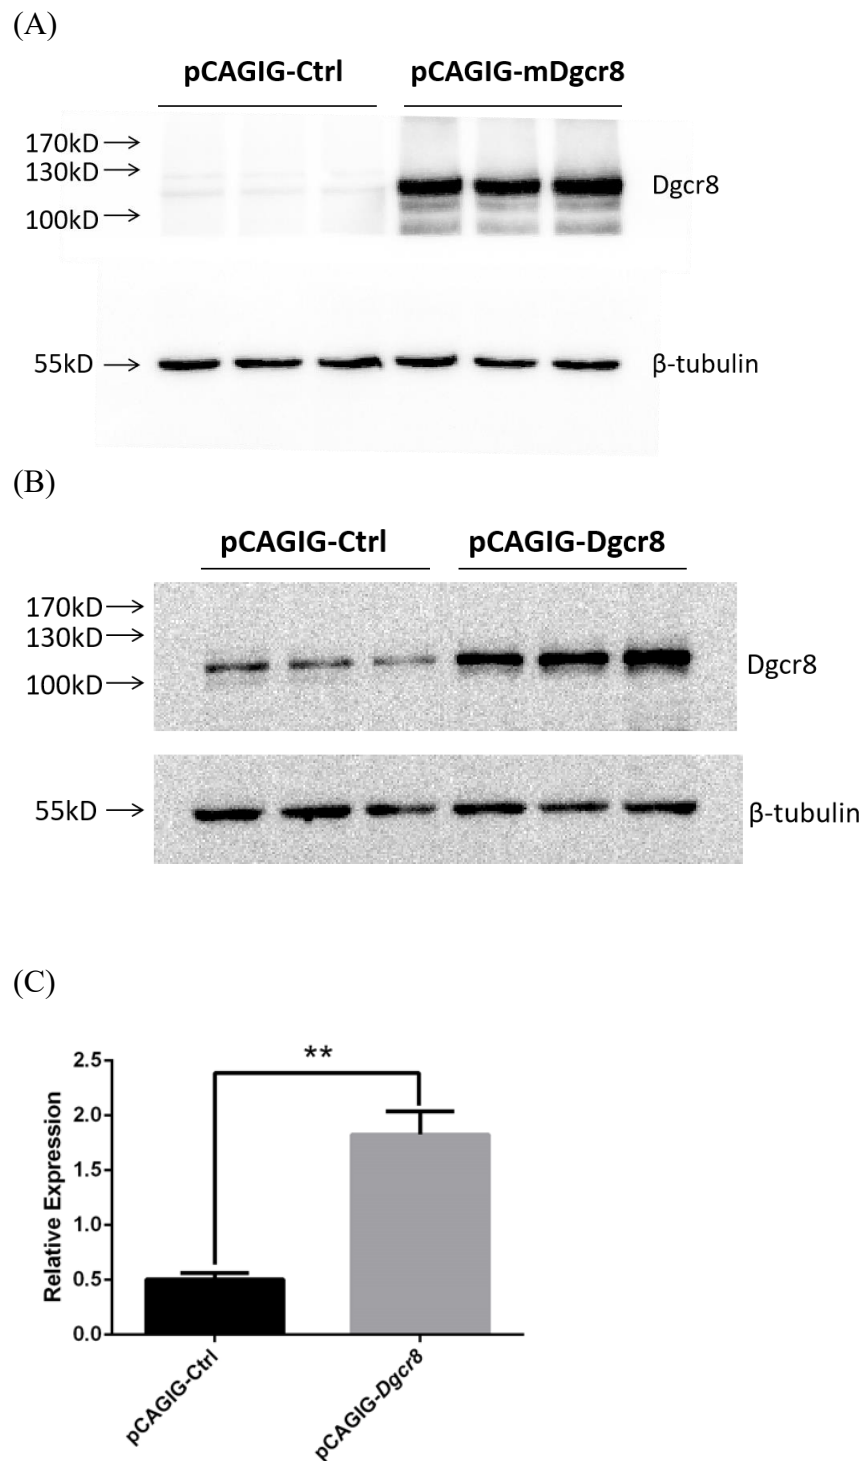

**Supplementary Figure 3.** The overexpression efficiency of constructs in 293T cells and cerebral cortex. (A). pCAGIG-Dgcr8-cDNA plasmid could overexpress Dgcr8 in 293T cells. Extracts from 293T cells transfected with pCAGIG-ctrl or pCAGIG-mDgcr8 plasmid were immunoblotted with Dgcr8 antibody (ProteinTech Group, 10996-1-AP). (B&C). Dgcr8 was overexpressed in cerebral cortex of case group. At E13.5, cerebral cortex of mouse embryo was transfected with pCAGIG-ctrl or

pCAGIG-mDgcr8 in utero electroporation. At 16.5, extracts from cerebral cortex were immunoblotted with Dgcr8 antibody (ProteinTech Group, 10996-1-AP). Protein levels were normalized to  $\beta$ -tubulin, presented as means  $\pm$  SEM. One-way ANOVA test.  $p=0.0039$ .

(A)

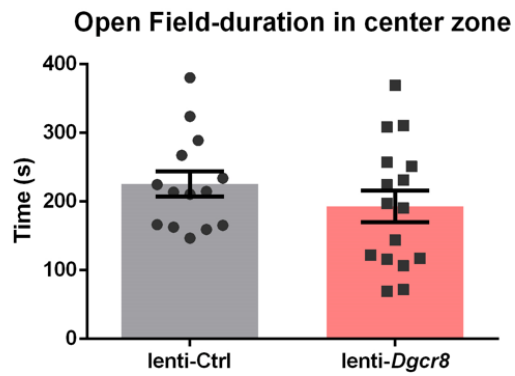

(B)

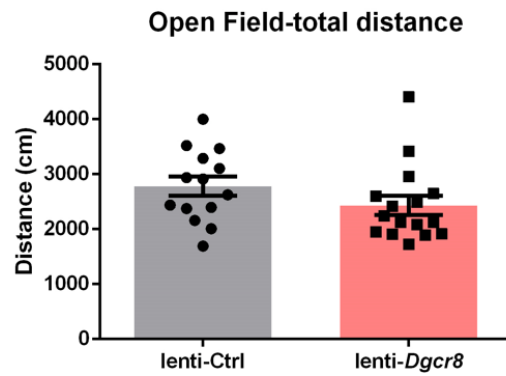

(C)

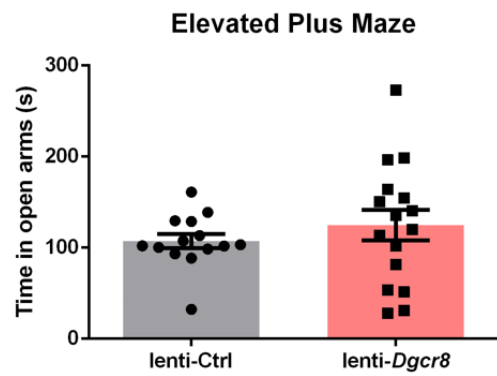

(D)

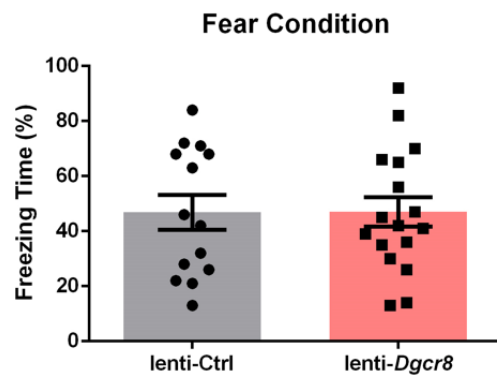

(E)

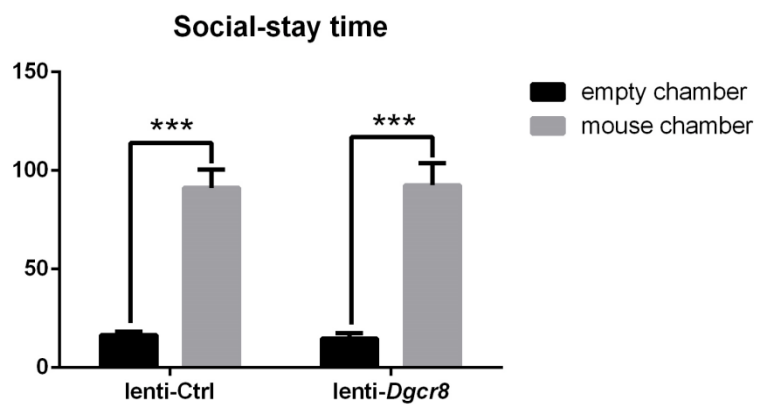

(F)

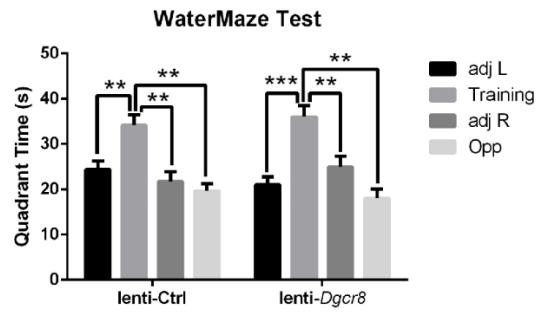

(G)

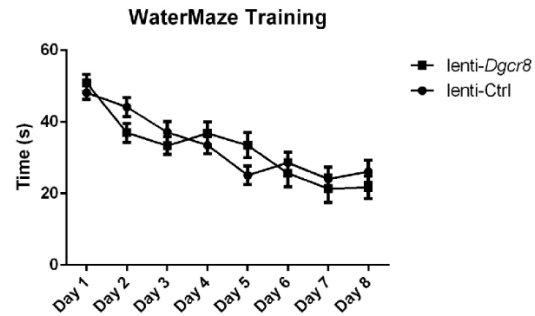

**Supplementary Figure 4.** Results of behavioral experiment. N=14 for lenti-Ctrl group and n=16 for lenti-*Dgcr8* group, mean  $\pm$  SEM. (A & B) Open field: Student's t-test showed no significant difference in the total distance or duration in center zone between control (lenti-Ctrl) and *Dgcr8* overexpression group (lenti-*Dgcr8*). (C) Elevated plus maze: Two-way ANOVA showed no significant difference in the time spent during the open arm region between lenti-Ctrl group and lenti-*Dgcr8* group. (D) Fear condition: Student's t-test showed no significant difference in the freezing time between lenti-Ctrl group and lenti-*Dgcr8* group. (E) Social ability test: Two-way ANOVA showed no significant difference between lenti-Ctrl group and lenti-*Dgcr8* group, and significant intragroup differences between mouse chamber and empty chamber (\*\* $P < 0.001$ ). (F) Water Maze Test: The proportion time spent in the four different quadrants of the mice in lenti-Ctrl group and lenti-*Dgcr8* group after 7-day training. Training represented the quadrant where the platform was located, adj L and adj R were the left and right quadrants of Training respectively, and Opp was the opposite quadrant of Training. (G) Water Maze Test: Seven-day learning curve showed no significant difference between lenti-Ctrl group and lenti-*Dgcr8* group.

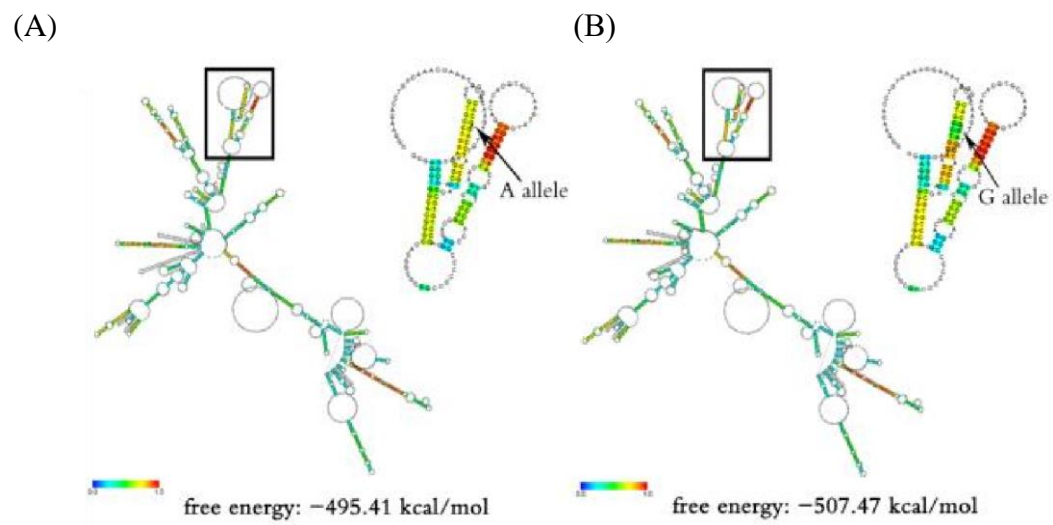

**Supplementary Figure 5.** The predicted secondary structure of DGCR8 3'UTR with A allele (A) or G allele (B) at rs3757 using CentroidFold with default parameters. Both structures are colored to indicate base-pairing probability. Arrows indicate the region in which rs3757 is located.
